# Supplementary material for: A thieno[3,2-c]pyridine-4,6-dione derived bisisoindigo for organic field-effect transistors
Source: Royal Society of Chemistry journal article supplement (doi:10.1039/d5nj01404b), 2025-01-01
Supplement: d5nj01404b1.pdf [file d5nj01404b1.pdf]

# **A thieno[3,2-c]pyridine-4,6-dione derived bisisoindigo for organic field-effect transistors**

Chang Li<sup>†</sup>, Fangliang Dong<sup>†</sup>, Rui Ge<sup>†</sup>, Ming Wang<sup>†\*</sup>

<sup>†</sup>State Key Laboratory for Modification of Chemical Fibers and Polymer Materials, Center for Advanced Low-dimension Materials, College of Materials Science and Engineering, Donghua University, Shanghai, 201620, China

**KEYWORDS.** conjugated polymers, isoindigo, organic field-effect transistors, ambipolar, charge carrier mobility.

E-mail: [mwang@dhu.edu.cn](mailto:mwang@dhu.edu.cn)

## **Supplementary Information**

### **Content**

1. General methods
2. Synthetic procedure
3. Thermal analysis
4. Quantum chemistry simulation
5. Cyclic voltammetry measurements
6. OFET fabrication and performance
7. UV-vis absorption of TPBIID annealed films
8. Morphologies of PTPBIID-BT film annealed at 200 °C.
9. NMR spectra

## 1. General methods

UV-Vis-NIR absorption spectra were recorded on a Perkin Elmer Lambda 950 spectrophotometer. Nuclear magnetic resonance (NMR) spectra were obtained on a Bruker 400 MHz spectrometer. High temperature gel permeation chromatography (HT-GPC) was performed on an Agilent PL-GPC 220 System using the eluent of chlorobenzene at 80 °C, and molecular weights were calculated relative to linear PS standards. Geometry and orbital calculations of polymers were carried out based on the density functional theory (DFT) CAM-B3LYP together with 6-31G(d,p) basis set by using the Gaussian 16 package on Swordfish-Cluster at the Shanghai Supercomputer Center. Thermogravimetric analysis (TGA) was performed on a TA instrument (TA Discovery TGA550) with about 1 ~ 3 mg polymers samples at a rate of 10 °C / min. Differential scanning calorimetry (DSC) measurements were carried out on a Discovery DSC250 instrument with about 1 ~ 3 mg polymer samples at a rate of 5 °C / min under nitrogen atmosphere. Cyclic voltammetry (CV) measurements were tested on a CHI-730 electrochemistry workstation. OFET devices were measured in a nitrogen atmosphere glovebox using a PRCBE SZ-6 probe station and a Keithley 4200A-SCS parameter analyzer. GIWAXS samples were prepared on Si substrates. The 10 keV X-ray beam was incident at a grazing angle of 0.11°-0.15°, which maximized the scattering intensity from the samples. In-plane and out-of-plane sector averages were calculated using the Nika software package. Tapping-mode atomic force microscopy (AFM) images were recorded by a Bruker Dimension Icon.

## 2. Synthetic procedure

4*H*-thieno[3,2-*c*]pyran-4,6(7*H*)-dione (**1**),<sup>1</sup> 5-(2-octyldodecyl)thieno[3,2-*c*]pyridine-4,6(5*H*,7*H*)-dione (**2b**),<sup>1</sup> 3,8-dihydroindolo[7,6-*g*]indole-1,2,6,7-tetraone (**3**),<sup>2</sup> 3,8-didodecyl-3,8-dihydroindolo[7,6-*g*]indole-1,2,6,7-tetraone (**4b**)<sup>2</sup> and 5,5'-bis(trimethylstannyl)-2,2'-bithiophene (**6**)<sup>3</sup> were synthesized according to reported methods. Other reagents were purchased from commercial resources. All solvents for reactions were purified and dried before use.

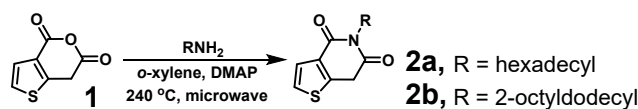

5-hexadecylthieno[3,2-*c*]pyridine-4,6(5*H*,7*H*)-dione (**2a**): In a nitrogen atmosphere glovebox, compound **1** (800 mg, 4.8 mmol, 1.0 eq.), DMAP (146 mg, 1.2 mmol, 0.25 eq.) and *o*-xylene (12 mL) were charged into a 20 mL microwave tube, then 1-hexadecylamine (1159 mg, 4.8 mmol, 1.0 eq.) was added into the mixture under stirring in 15 minutes. The tube was sealed and then heated at 240 °C for 2 hours through a microwave initiator. Then the *o*-xylene was removed via rotavapor and the crude product was purified via silica-gel chromatograph using mineral ether and dichloromethane (1:3, v/v) as the eluent to produce the pure product as dark red oil (0.65 g, 1.66 mmol, 35% yield). <sup>1</sup>H NMR (chloroform-*d*, 298 K, 400 MHz,  $\delta$ /ppm): 7.5 (d, 1H), 7.28 (d, 1H), 4.11 (s, 2H), 3.94-3.90 (m, 2H), 1.62-1.55 (m, 2H), 1.36-1.24 (m, 26H), 0.88 (t, 3H). <sup>13</sup>C NMR (chloroform-*d*, 298 K, 100 MHz,  $\delta$ /ppm): 168.34, 160.95, 143.02, 139.88, 125.86, 125.21, 40.03, 34.25, 31.95, 29.72, 29.69, 29.67, 29.65, 29.62, 29.59, 29.56, 29.55, 29.38, 29.35, 28.04, 27.05, 22.72, 14.15.

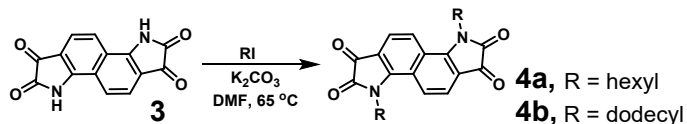

3,8-dihexyl-3,8-dihydroindolo[7,6-*g*]indole-1,2,6,7-tetraone (**4a**): To a suspension of **3** (1.0 g, 3.76 mmol, 1.0 eq.) in anhydrous DMF (15.0 mL) was added freshly dried  $K_2CO_3$  (2.1 g, 15.03 mmol, 4.0 eq.). The mixture was heated to 65 °C. After 1 hour, 1-iodohexane (2.39 g, 11.27 mmol, 3.0 eq.) was added in one portion. The reaction

mixture was stirred at 65 °C. for 6 hours. The reaction mixture was cooled down to room temperature and poured over water and acidified with 1M HCl to pH of 7. The aqueous layer was extracted with dichloromethane, washed with water, brine and dried over MgSO<sub>4</sub>. The solvent was removed under vacuum. The crude product was purified by silica-gel column chromatography using dichloromethane and ethyl acetate (1/4, v/v) as the eluent, washed with hexane and filtered. The final product was obtained as blue solid (244 mg, 0.56 mmol, 15%). <sup>1</sup>H NMR (chloroform-*d*, 298 K, 400 MHz, δ/ppm): 7.96 (d, 2H), 7.68 (d, 2H), 4.24 (t, 4H), 1.87-1.77 (m, 4H), 1.5-1.25 (m, 12H), 0.89 (t, 28Hz, 6H). <sup>13</sup>C NMR (chloroform-*d*, 298 K, 100 MHz, δ/ppm): 182.85, 159.03, 152.22, 127.30, 120.28, 119.64, 116.22, 43.52, 31.30, 29.71, 29.27, 26.33, 22.49, 13.96.

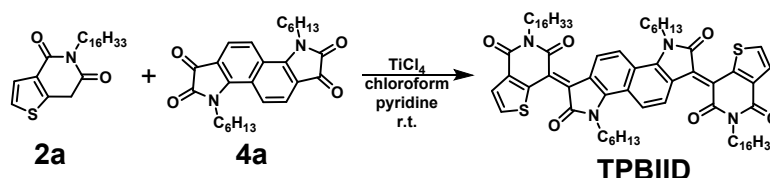

(7*Z*,7'*Z*)-7,7'-(3,8-dihexyl-2,7-dioxo-2,3,7,8-tetrahydroindolo[7,6-*g*]indole-1,6-diylidene)bis(5-hexadecylthieno[3,2-*c*]pyridine-4,6(5*H*,7*H*)-dione) (**TPBIID**): Compound **2a** (0.397 g, 1.012 mmol) and **4a** (0.200 g, 0.460 mmol) were dissolved in chloroform (10.0 mL) in a round-bottom flask (50 mL). Then titanium tetrachloride (0.1 mL) and pyridine (0.1 mL) were also added to the flask. The reaction mixture was stirred at 60 °C for 1 hour under nitrogen. The reaction was cooled to room temperature and quenched in water. Then the crude product was extracted with dichloromethane. The organic phase was dried over MgSO<sub>4</sub>, evaporated to remove the solvent, and purified by silica-gel column chromatography using mineral ether and dichloromethane (1/3, v/v) as the eluent to obtain the pure product as green solid (217.4 mg, 40%). <sup>1</sup>H NMR (chloroform-*d*, 298 K, 400 MHz, δ/ppm): 7.82 (d, 2H), 7.74-7.70 (m, 4H), 7.54 (d, 2H), 4.28 (t, 4H), 4.13 (t, 4H), 1.93-1.70 (m, 8H), 1.52-1.17 (m, 64H), 0.97-0.81 (m, 12H). <sup>13</sup>C NMR (chloroform-*d*, 298 K, 100 MHz, δ/ppm): 167.1, 163.88, 158.45, 141.73, 138.11, 131.95, 130.46, 130.19, 127.68, 125.64, 121.59, 121.16, 118.87,

115.48, 41.87, 39.73, 30.39, 30.39, 29.86, 29.86, 28.17, 28.16, 28.15, 28.13, 28.09, 28.06, 27.89, 27.86, 27.83, 26.84, 25.63, 24.96, 21.16, 21.04, 12.60, 12.49.

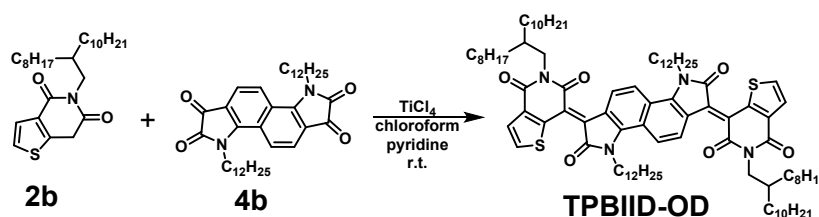

(7*Z*,7'*Z*)-7,7'-(3,8-didodecyl-2,7-dioxo-2,3,7,8-tetrahydroindolo[7,6-*g*]indole-1,6-diylidene)bis(5-(2-octyldodecyl)thieno[3,2-*c*]pyridine-4,6(5*H*,7*H*)-dione) (**TPBIID-OD**): Compound **2b** (0.397 g, 0.829 mmol) and **4b** (0.200 g, 0.332 mmol) were dissolved in chloroform (10.0 mL) in a round-bottom flask (50 mL). Then titanium tetrachloride (0.1 mL) and pyridine (0.1 mL) were also added to the flask. The reaction mixture was stirred at 60 °C for 1 hour under nitrogen. The reaction was cooled to room temperature and quenched in water. Then the crude product was extracted with dichloromethane. The organic phase was dried over MgSO<sub>4</sub>, evaporated to remove the solvent, and purified by silica-gel column chromatography using mineral ether and dichloromethane (1/2, v/v) as the eluent to obtain the pure product as green solid (169.7 mg, 35%). <sup>1</sup>H NMR (chloroform-*d*, 298 K, 400 MHz, δ/ppm): 7.84 (d, 2H), 7.74-7.70 (m, 4H), 7.54 (d, 2H), 4.28 (t, 4H), 4.07 (t, 4H), 2.04-1.94 (m, 2H), 1.92-1.82 (m, 4H), 1.40-1.15 (m, 100H), 0.88-0.83 (m, 18H). <sup>13</sup>C NMR (chloroform-*d*, 298 K, 100 MHz, δ/ppm): 166.20, 163.33, 157.95, 140.69, 137.09, 131.04, 129.55, 129.07, 126.97, 124.78, 120.66, 120.15, 117.89, 114.52, 42.75, 40.95, 34.43, 29.46, 29.44, 29.42, 29.40, 29.38, 27.59, 27.21, 27.20, 27.19, 27.18, 27.17, 27.16, 27.15, 27.14, 27.13, 27.12, 26.95, 26.91, 26.88, 26.87, 26.85, 24.45, 24.14, 20.23, 20.22, 20.20, 11.65, 11.64, 11.63.

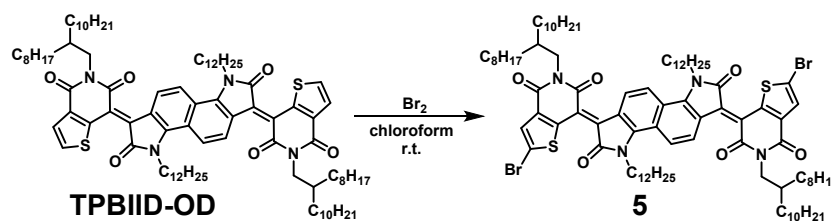

(7Z,7'Z)-7,7'-(3,8-didodecyl-2,7-dioxo-2,3,7,8-tetrahydroindolo[7,6-g]indole-1,6-diylidene)bis(2-bromo-5-(2-octyldodecyl)thieno[3,2-c]pyridine-4,6(5H,7H)-dione) (**5**): The bromine (35 mg, 0.218 mmol) was dissolved in 2 mL of chloroform and then was added dropwise into a solution of **TPBIID-OD** (160 mg, 0.109 mmol) in 5 mL chloroform at 0 °C. Then the reaction was warmed to room temperature and stirred for 2 hours. The reaction was quenched in 50 mL water, and the organic layer was extracted with chloroform for three times. The chloroform fractions were combined and dried over MgSO<sub>4</sub>, then the organic solvent was removed under a reduced pressure via a rotavapor. The residue was further purified by silica-gel column chromatography using dichloromethane and mineral ether (2/1, v/v) as the eluent. The compound **5** was obtained as green solid (141 mg, yield 80%). <sup>1</sup>H NMR (chloroform-*d*, 298 K, 400 MHz,  $\delta$ /ppm): 7.81 (d, 2H), 7.72-7.68 (m, 4H), 4.28 (t, 4H), 4.05 (t, 4H), 2.04-1.94 (m, 2H), 1.92-1.82 (m, 4H), 1.49-1.17 (m, 100H), 0.91-0.80 (m, 18H). <sup>13</sup>C NMR (chloroform-*d*, 298 K, 100 MHz,  $\delta$ /ppm): 166.38, 162.73, 156.81, 140.75, 137.97, 130.95, 128.57, 127.16, 125.96, 120.69, 120.18, 119.65, 117.78, 114.62, 42.75, 40.95, 34.43, 29.46, 29.44, 29.42, 29.40, 29.38, 27.59, 27.21, 27.20, 27.19, 27.18, 27.17, 27.16, 27.15, 27.14, 27.13, 27.12, 26.95, 26.91, 26.88, 26.87, 26.85, 24.45, 24.14, 20.23, 20.22, 20.20, 11.65, 11.64, 11.63.

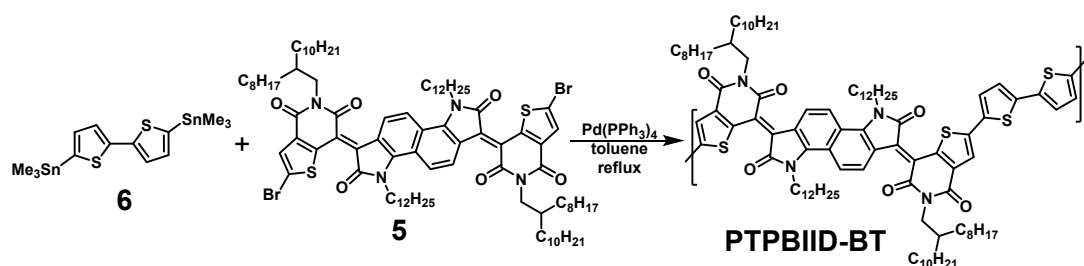

**PTPBIID-BT**: In a dry 0.5-2 mL microwave reaction vial, monomer **5** (0.1 g, 0.0617 mmol), **6** (31.2 mg, 0.0635 mmol), Pd(PPh<sub>3</sub>)<sub>4</sub> (3.56 mg, 0.003 mmol) and toluene (1.5 mL) were added inside a nitrogen atmosphere glovebox. The vial was then sealed using a Teflon® cap and put in oil bath to heat to reflux with stirring for 9 hours. The reaction was allowed to cool to room temperature. The vial was then transferred to the glovebox to add Pd(PPh<sub>3</sub>)<sub>4</sub> (3 mg), 2-bromothiophene (0.1 mL) and toluene (0.5 mL) for end-

capping reaction in oil bath to heat to reflux with stirring for an hour. The reaction was allowed to cool to room temperature and the polymer was precipitated in methanol. The precipitates were collected by filter paper and extracted with methanol, hexane, dichloromethane, chloroform and chlorobenzene via a Soxhlet extractor, respectively. The chlorobenzene fraction was concentrated via a rotavapor and then passed through a short silica-gel (60-100 mesh) column. The collected polymer solution was concentrated again and was drop-wised to methanol under stirring. The polymer was precipitated and collected via a filter paper, dried over in the vacuum to obtain the final product as black solid (50mg, yield 49%). Molecular weight (in chlorobenzene at 80 °C):  $M_n = 45.6$  kDa, PDI = 3.0

## Reference

1. F.-L. Dong, Y. Zhang, H. Wei, C. Li, Z. Li, J. Gao, Y. Hu, Z. Tang, and M. Wang, *ACS Appl. Polym. Mater.*, 2023, **5**, 9056–9062.
2. K. Huang, X. Zhao, Y. Du, S. Kim, X. Wang, H. Lu, K. Cho, G. Zhang, and L. Qiu, *J. Mater. Chem. C*, 2019, **7**, 7618–7626.
3. T. Lei, Y. Cao, Y. Fan, C.-J. Liu, S.-C. Yuan, and J. Pei, *J. Am. Chem. Soc.*, 2011, **133**, 6099–6101.

### 3. Thermal analysis

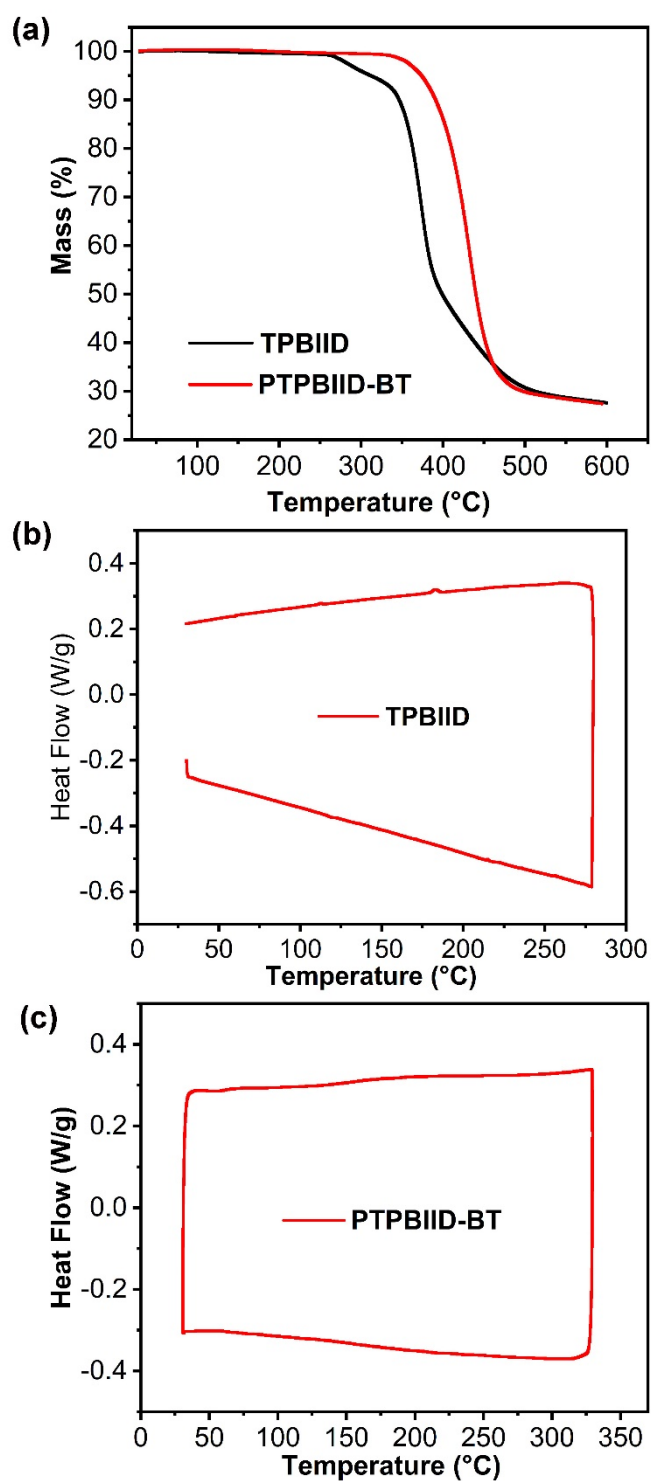

**Figure S1.** Thermal properties of TPBIID and PTPBIID-BT: (a) TGA measurements of TPBIID and PTPBIID-BT; (b) DSC measurement of TPBIID; (c) DSC measurement of PTPBIID-BT.



#### 4. Quantum chemistry simulation

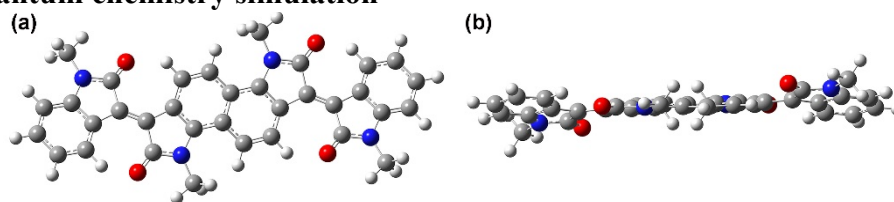

**Figure S2.** Geometries of bisisoindigo structure: (a) top-view; (b) side-view.

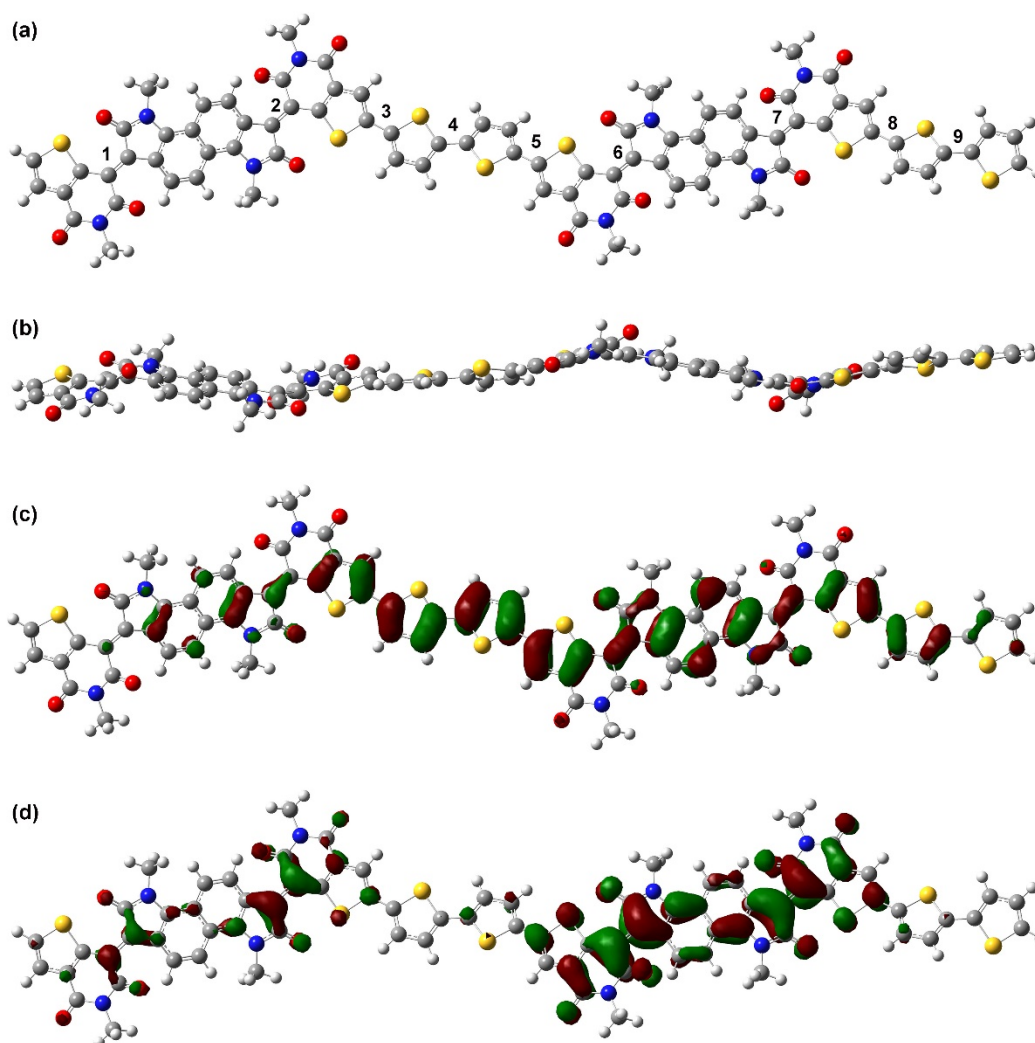

**Figure S3.** PTPBIID-BT dimer: (a) top-view; (b) side-view; (c) HOMO; (d) LUMO.

**Table S1.** Dihedral angles of PTPBIID-BT dimer in Figure S3a.

| Label        | 1    | 2    | 3    | 4    | 5    | 6    | 7    | 8    | 9    | average |
|--------------|------|------|------|------|------|------|------|------|------|---------|
| Dihedral (°) | 18.0 | 18.6 | 15.9 | 18.6 | 19.5 | 18.7 | 18.7 | 18.8 | 23.3 | 18.9    |

## 5. Cyclic voltammetry measurements

A three-electrode cell equipped with a glassy carbon working electrode, an Ag/AgCl reference electrode and a Pt wire counter-electrode. The measurements were performed in absolute acetonitrile with tetrabutylammonium hexafluorophosphate (0.1 M) as the supporting electrolyte at a scan rate of 50 mV/s under a nitrogen atmosphere. Semiconductor films for were drop-casted onto the glassy carbon working electrode from their chlorobenzene solution at a concentration of 5 mg/mL. The oxidation-reduction potential of ferrocene was also measured as the reference. The absolute energy level of ferrocene/ferrocenium ( $\text{Fc}/\text{Fc}^+$ ) was set to be 4.8 eV below vacuum. The  $E_{\text{HOMO}}$  and  $E_{\text{LUMO}}$  were calculated from the equations of “ $E_{\text{HOMO}} = (E_{\text{ox}} - E_{\text{ferrocene}} + 4.8)$  eV” and “ $E_{\text{LUMO}} = -(E_{\text{red}} - E_{\text{ferrocene}} + 4.8)$  eV”, where  $E_{\text{ox}}$  and  $E_{\text{red}}$  were the oxidation and reduction onsets, respectively, and  $E_{\text{ferrocene}}$  is the oxidation-reduction potential.

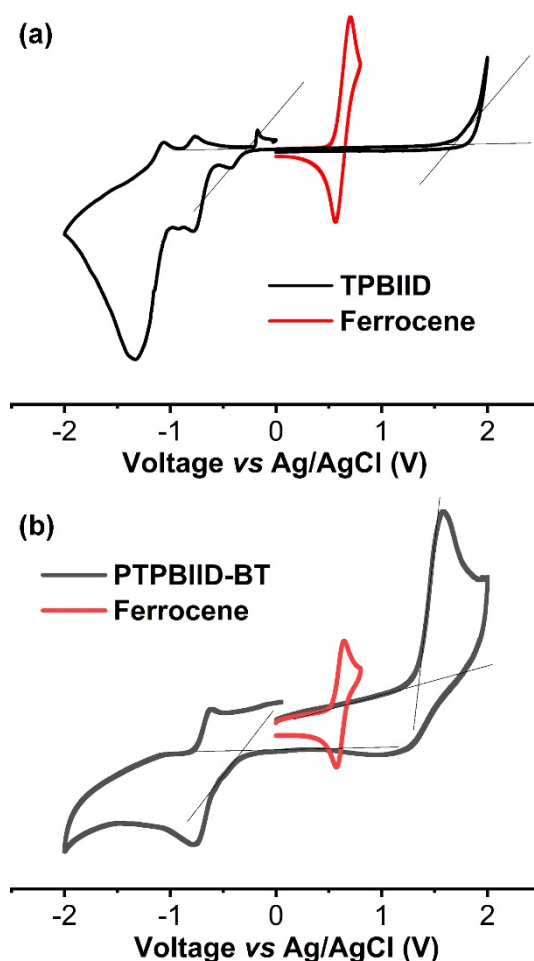

**Figure S4.** Cyclic voltammetry measurements of: (a) TPBIID; (b) PTPBIID-BT.

## 6. OFET fabrication and performance

*Device fabrication:* Substrates with source and drain contacts (Ti/Au, 2/35 nm) were custom-made in First MEMS Co., Ltd. using photolithography process. Before polymer deposition, the substrates were cleaned by sonication in acetone and isopropanol for 3 minutes each, and were then dried in an oven under ambient atmosphere at 120 °C for 10 minutes, treated with UV-O<sub>3</sub> for 15 minutes, and then passivated by using decyltrichlorosilane (from Gelest Chemicals) from a 1 vol% solution in toluene at 120 °C for 2 hours. The substrates were then rinsed and sonicated in toluene and dried under nitrogen flow. TPBIID films were spin-coated from the chloroform solution at a concentration of 5 mg/mL. PTPBIID-BT films were spin-coated from the chlorobenzene solution at a concentration of 5 mg/mL. The final device architecture (from bottom to top) for these bottom gate, bottom contact field-effect transistors was Si/ SiO<sub>2</sub>/DTS/ Au/Polymer semiconductor layer. The mobility of OFET devices were obtained by fitting the following equation to the saturation regime transfer characteristics:  $I_{DS} = (W/2L) C_i \mu (V_{GS} - V_T)^2$ , where  $W$  is the channel width (1000  $\mu\text{m}$ ),  $L$  is the channel length (80  $\mu\text{m}$ ),  $C_i$  is the gate dielectric layer capacitance per unit area (11 nF/cm<sup>2</sup>),  $V_{GS}$  is the gate voltage,  $V_T$  is the threshold voltage, and  $I_{DS}$  is the source-drain current. Devices were measured under nitrogen in a glovebox. Hole mobility values were calculated from a gate voltage range of 0 V to -80 V at a source-drain voltage of -80 V, while electron mobility values were calculated from a gate voltage range of 0 V to 80 V at a source-drain voltage of 80 V.

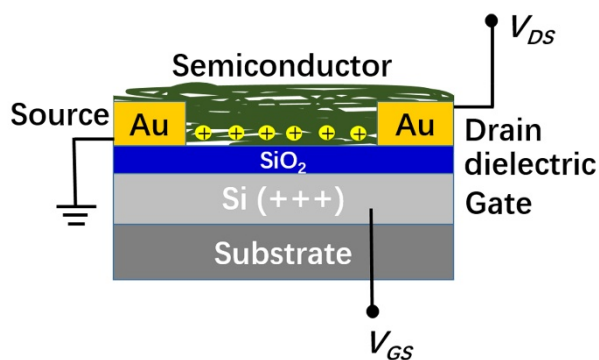

**Figure S5.** OFET device structure.

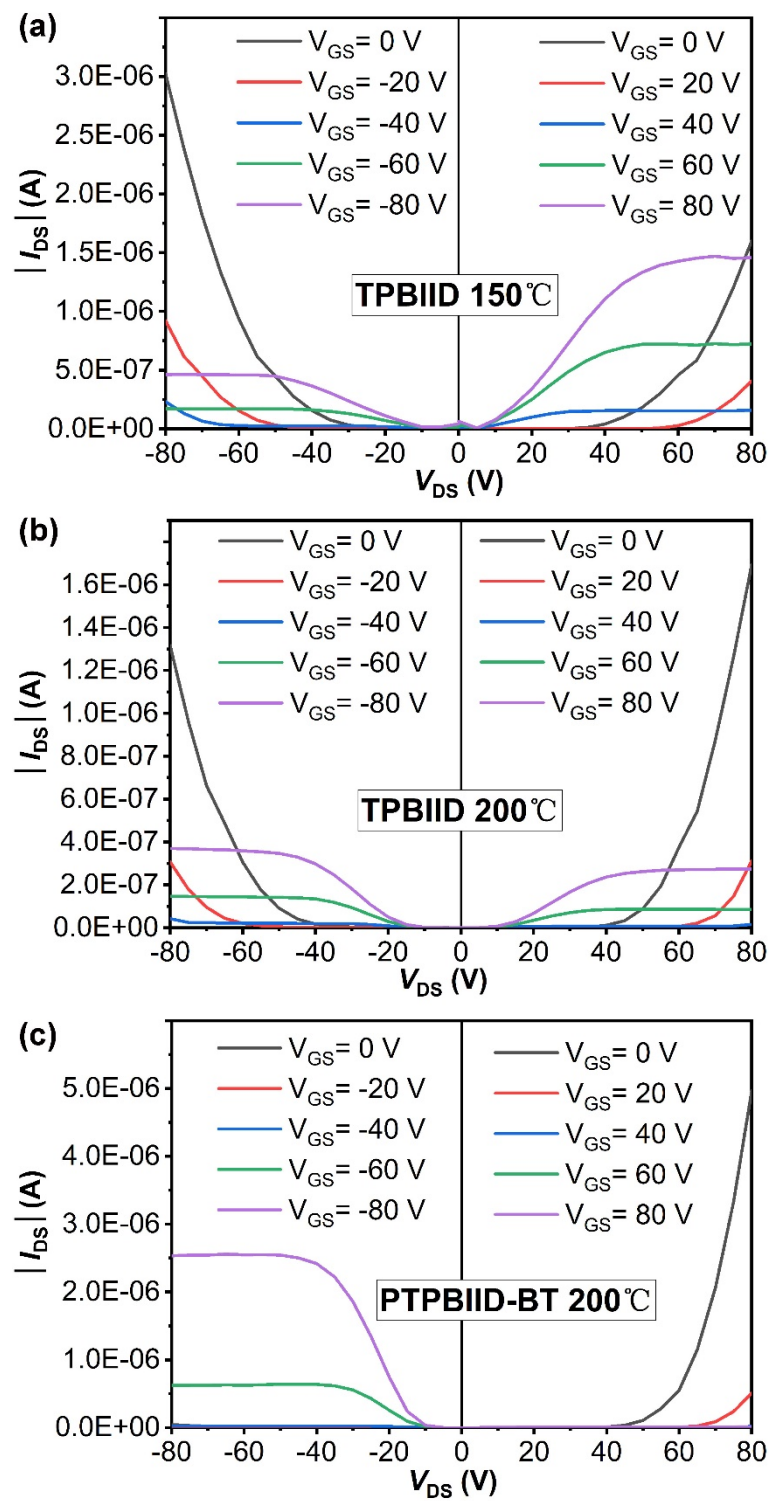

**Figure S6.** Transfer curves of: (a) TPBIID film annealed at 150 °C; (b) TPBIID film annealed at 200 °C; (c) PTPBIID-BT film annealed at 200 °C.

**Table S2. Tested OFET performance of TPBIID devices without annealing.**

|         | <i>p</i> -channel                                           |                           |          | <i>n</i> -channel                                           |                           |          |
|---------|-------------------------------------------------------------|---------------------------|----------|-------------------------------------------------------------|---------------------------|----------|
| device  | Mobility (cm <sup>2</sup> V <sup>-1</sup> s <sup>-1</sup> ) | <i>V</i> <sub>T</sub> (V) | On/off   | Mobility (cm <sup>2</sup> V <sup>-1</sup> s <sup>-1</sup> ) | <i>V</i> <sub>T</sub> (V) | On/off   |
| 1       | 0.00063                                                     | -25.46                    | 1.44E+02 | 0.00147                                                     | 36.76                     | 5.70E+02 |
| 2       | 0.00118                                                     | -42.53                    | 2.59E+05 | 0.00093                                                     | 45.44                     | 1.02E+04 |
| 3       | 0.00118                                                     | -22.09                    | 1.10E+03 | 0.00218                                                     | 37.59                     | 7.56E+03 |
| 4       | 0.00092                                                     | -35.00                    | 2.00E+04 | 0.00126                                                     | 37.48                     | 7.58E+03 |
| 5       | 0.00110                                                     | -15.08                    | 2.95E+02 | 0.00124                                                     | 24.61                     | 4.04E+02 |
| 6       | 0.00150                                                     | -44.38                    | 8.24E+05 | 0.00198                                                     | 43.21                     | 1.23E+04 |
| 7       | 0.00146                                                     | -23.34                    | 3.72E+02 | 0.00246                                                     | 34.54                     | 2.52E+03 |
| 8       | 0.00077                                                     | -38.42                    | 3.70E+04 | 0.00136                                                     | 41.62                     | 4.35E+03 |
| 9       | 0.00121                                                     | -23.23                    | 9.48E+02 | 0.00227                                                     | 37.25                     | 9.16E+03 |
| Average | 0.00111                                                     | -29.95                    | 1.27E+05 | 0.00168                                                     | 37.61                     | 6.07E+03 |

**Table S3. Tested OFET performance of TPBIID devices annealed at 100 °C.**

|         | <i>p</i> -channel                                           |                           |          | <i>n</i> -channel                                           |                           |          |
|---------|-------------------------------------------------------------|---------------------------|----------|-------------------------------------------------------------|---------------------------|----------|
| device  | Mobility (cm <sup>2</sup> V <sup>-1</sup> s <sup>-1</sup> ) | <i>V</i> <sub>T</sub> (V) | On/off   | Mobility (cm <sup>2</sup> V <sup>-1</sup> s <sup>-1</sup> ) | <i>V</i> <sub>T</sub> (V) | On/off   |
| 1       | 0.00401                                                     | -47.91                    | 3.24E+03 | 0.00093                                                     | 41.77                     | 8.57E+02 |
| 2       | 0.00273                                                     | -32.12                    | 1.38E+02 | 0.00795                                                     | 32.57                     | 4.22E+02 |
| 3       | 0.00231                                                     | -47.06                    | 1.83E+04 | 0.00392                                                     | 43.84                     | 4.75E+03 |
| 4       | 0.00305                                                     | -36.32                    | 1.01E+03 | 0.01125                                                     | 30.79                     | 9.87E+02 |
| 5       | 0.00379                                                     | -43.47                    | 4.28E+03 | 0.00531                                                     | 39.55                     | 7.18E+02 |
| 6       | 0.00460                                                     | -23.81                    | 7.94E+01 | 0.01016                                                     | 20.83                     | 6.30E+01 |
| 7       | 0.00214                                                     | -34.00                    | 1.30E+04 | 0.00727                                                     | 32.73                     | 3.02E+02 |
| 8       | 0.00207                                                     | -48.05                    | 9.24E+01 | 0.00576                                                     | 37.69                     | 2.38E+03 |
| 9       | 0.00240                                                     | -20.53                    | 9.24E+01 | 0.00638                                                     | 42.54                     | 2.28E+03 |
| Average | 0.00301                                                     | -37.03                    | 4.47E+03 | 0.00655                                                     | 35.81                     | 1.42E+03 |

**Table S4. Tested OFET performance of TPBIID devices annealed at 150 °C.**

|         | <i>p</i> -channel                                           |                           |          | <i>n</i> -channel                                           |                           |          |
|---------|-------------------------------------------------------------|---------------------------|----------|-------------------------------------------------------------|---------------------------|----------|
| device  | Mobility (cm <sup>2</sup> V <sup>-1</sup> s <sup>-1</sup> ) | <i>V</i> <sub>T</sub> (V) | On/off   | Mobility (cm <sup>2</sup> V <sup>-1</sup> s <sup>-1</sup> ) | <i>V</i> <sub>T</sub> (V) | On/off   |
| 1       | 0.00785                                                     | -28.40                    | 7.15E+01 | 0.01472                                                     | 17.40                     | 5.42E+01 |
| 2       | 0.00584                                                     | -35.53                    | 2.87E+02 | 0.01081                                                     | 33.63                     | 2.17E+02 |
| 3       | 0.00380                                                     | -32.51                    | 2.39E+02 | 0.01135                                                     | 23.93                     | 1.88E+02 |
| 4       | 0.00379                                                     | -45.76                    | 2.55E+03 | 0.00594                                                     | 43.80                     | 1.78E+03 |
| 5       | 0.00416                                                     | -35.41                    | 4.29E+02 | 0.01381                                                     | 26.86                     | 3.25E+02 |
| 6       | 0.00366                                                     | -42.81                    | 2.30E+03 | 0.01072                                                     | 36.82                     | 9.09E+02 |
| 7       | 0.00382                                                     | -32.22                    | 4.52E+02 | 0.00642                                                     | 38.05                     | 7.60E+02 |
| 8       | 0.00317                                                     | -43.98                    | 7.65E+02 | 0.00864                                                     | 34.14                     | 6.26E+02 |
| 9       | 0.00288                                                     | -28.17                    | 3.91E+02 | 0.01132                                                     | 25.89                     | 3.01E+02 |
| Average | 0.00433                                                     | -36.06                    | 8.31E+02 | 0.01041                                                     | 31.17                     | 5.74E+02 |

**Table S5. Tested OFET performance of TPBIID devices annealed at 200 °C.**

|         | <i>p</i> -channel                                           |                           |          | <i>n</i> -channel                                           |                           |          |
|---------|-------------------------------------------------------------|---------------------------|----------|-------------------------------------------------------------|---------------------------|----------|
| device  | Mobility (cm <sup>2</sup> V <sup>-1</sup> s <sup>-1</sup> ) | <i>V</i> <sub>T</sub> (V) | On/off   | Mobility (cm <sup>2</sup> V <sup>-1</sup> s <sup>-1</sup> ) | <i>V</i> <sub>T</sub> (V) | On/off   |
| 1       | 0.00819                                                     | -23.27                    | 1.21E+02 | 0.00979                                                     | 36.16                     | 1.19E+03 |
| 2       | 0.00785                                                     | -28.02                    | 1.21E+02 | 0.00777                                                     | 38.67                     | 1.40E+03 |
| 3       | 0.01036                                                     | -43.10                    | 1.88E+03 | 0.00765                                                     | 35.35                     | 1.12E+03 |
| 4       | 0.00807                                                     | -27.90                    | 1.47E+02 | 0.00913                                                     | 30.33                     | 3.83E+02 |
| 5       | 0.00904                                                     | -43.06                    | 1.64E+03 | 0.00673                                                     | 36.57                     | 1.11E+03 |
| 6       | 0.00765                                                     | -25.78                    | 1.46E+02 | 0.00901                                                     | 34.15                     | 1.33E+03 |
| 7       | 0.01087                                                     | -41.46                    | 1.45E+03 | 0.00728                                                     | 36.20                     | 1.12E+03 |
| 8       | 0.00781                                                     | -32.60                    | 2.11E+02 | 0.00958                                                     | 30.15                     | 4.45E+02 |
| 9       | 0.01039                                                     | -41.07                    | 1.37E+03 | 0.00608                                                     | 34.43                     | 9.00E+02 |
| Average | 0.00891                                                     | -34.03                    | 7.88E+02 | 0.00811                                                     | 34.67                     | 9.99E+02 |

**Table S6. Tested OFET performance of PTPBIID-BT devices without annealing.**

|         | <i>p</i> -channel                                           |                           |          | <i>n</i> -channel                                           |                           |          |
|---------|-------------------------------------------------------------|---------------------------|----------|-------------------------------------------------------------|---------------------------|----------|
| device  | Mobility (cm <sup>2</sup> V <sup>-1</sup> s <sup>-1</sup> ) | <i>V</i> <sub>T</sub> (V) | On/off   | Mobility (cm <sup>2</sup> V <sup>-1</sup> s <sup>-1</sup> ) | <i>V</i> <sub>T</sub> (V) | On/off   |
| 1       | 0.03796                                                     | -38.48                    | 7.38E+05 | 0.00008                                                     | 53.31                     | 5.88E+05 |
| 2       | 0.02641                                                     | -16.78                    | 5.24E+06 | 0.00004                                                     | 37.01                     | 1.13E+06 |
| 3       | 0.04504                                                     | -43.89                    | 6.38E+05 | 0.00008                                                     | 50.90                     | 5.10E+05 |
| 4       | 0.02087                                                     | -11.29                    | 1.90E+06 | 0.00004                                                     | 35.76                     | 1.36E+06 |
| 5       | 0.04832                                                     | -44.97                    | 5.06E+05 | 0.00007                                                     | 48.94                     | 3.58E+05 |
| 6       | 0.02382                                                     | -21.37                    | 2.70E+06 | 0.00003                                                     | 10.29                     | 1.31E+05 |
| 7       | 0.02361                                                     | -12.89                    | 8.70E+05 | 0.00003                                                     | 33.96                     | 4.71E+05 |
| 8       | 0.04442                                                     | -38.11                    | 6.66E+05 | 0.00009                                                     | 52.60                     | 2.68E+06 |
| 9       | 0.02528                                                     | -11.80                    | 7.30E+04 | 0.00004                                                     | 33.25                     | 3.90E+05 |
| Average | 0.03286                                                     | -26.62                    | 1.48E+06 | 0.00006                                                     | 39.56                     | 8.46E+05 |

**Table S7. Tested OFET performance of PTPBIID-BT devices annealed at 100 °C.**

|         | <i>p</i> -channel                                           |                           |          | <i>n</i> -channel                                           |                           |          |
|---------|-------------------------------------------------------------|---------------------------|----------|-------------------------------------------------------------|---------------------------|----------|
| device  | Mobility (cm <sup>2</sup> V <sup>-1</sup> s <sup>-1</sup> ) | <i>V</i> <sub>T</sub> (V) | On/off   | Mobility (cm <sup>2</sup> V <sup>-1</sup> s <sup>-1</sup> ) | <i>V</i> <sub>T</sub> (V) | On/off   |
| 1       | 0.07247                                                     | -49.89                    | 5.48E+05 | 0.00004                                                     | 41.00                     | 7.77E+07 |
| 2       | 0.03809                                                     | -27.58                    | 6.02E+06 | 0.00004                                                     | 5.08                      | 8.07E+04 |
| 3       | 0.06715                                                     | -46.31                    | 9.99E+05 | 0.00005                                                     | 41.94                     | 3.49E+06 |
| 4       | 0.03702                                                     | -27.93                    | 2.57E+06 | 0.00004                                                     | 6.29                      | 2.37E+04 |
| 5       | 0.07158                                                     | -45.92                    | 7.11E+05 | 0.00006                                                     | 43.50                     | 8.36E+06 |
| 6       | 0.07338                                                     | -47.37                    | 2.66E+06 | 0.00006                                                     | 41.76                     | 3.43E+06 |
| 7       | 0.04792                                                     | -20.38                    | 4.38E+06 | 0.00004                                                     | 33.73                     | 8.45E+06 |
| 8       | 0.07925                                                     | -46.37                    | 2.66E+06 | 0.00007                                                     | 46.11                     | 9.45E+05 |
| 9       | 0.04603                                                     | -20.66                    | 1.31E+07 | 0.00005                                                     | 31.03                     | 2.60E+06 |
| Average | 0.05921                                                     | -36.94                    | 3.74E+06 | 0.00005                                                     | 32.27                     | 1.17E+07 |

**Table S8. Tested OFET performance of PTPBIID-BT devices annealed at 150 °C.**

|         | <i>p</i> -channel                                           |                           |          | <i>n</i> -channel                                           |                           |          |
|---------|-------------------------------------------------------------|---------------------------|----------|-------------------------------------------------------------|---------------------------|----------|
| device  | Mobility (cm <sup>2</sup> V <sup>-1</sup> s <sup>-1</sup> ) | <i>V</i> <sub>T</sub> (V) | On/off   | Mobility (cm <sup>2</sup> V <sup>-1</sup> s <sup>-1</sup> ) | <i>V</i> <sub>T</sub> (V) | On/off   |
| 1       | 0.09536                                                     | -37.90                    | 9.44E+05 | 0.00012                                                     | 49.97                     | 3.02E+07 |
| 2       | 0.05562                                                     | -33.00                    | 1.92E+06 | 0.00012                                                     | 19.91                     | 2.71E+04 |
| 3       | 0.09732                                                     | -40.10                    | 3.25E+06 | 0.00011                                                     | 48.92                     | 5.50E+06 |
| 4       | 0.05618                                                     | -33.25                    | 2.20E+06 | 0.00013                                                     | 19.92                     | 2.57E+04 |
| 5       | 0.08092                                                     | -58.29                    | 3.07E+05 | 0.00014                                                     | 42.11                     | 7.82E+06 |
| 6       | 0.06724                                                     | -26.47                    | 8.23E+06 | 0.00012                                                     | 31.92                     | 8.76E+04 |
| 7       | 0.10594                                                     | -41.77                    | 7.26E+06 | 0.00011                                                     | 47.05                     | 1.55E+07 |
| 8       | 0.06857                                                     | -27.08                    | 3.68E+06 | 0.00012                                                     | 32.67                     | 9.26E+04 |
| 9       | 0.10445                                                     | -40.68                    | 4.89E+06 | 0.00011                                                     | 47.03                     | 1.96E+07 |
| Average | 0.08129                                                     | -37.62                    | 3.63E+06 | 0.00012                                                     | 37.72                     | 8.76E+06 |

**Table S9. Tested OFET performance of PTPBIID-BT devices annealed at 200°C.**

|         | <i>p</i> -channel                                           |                           |          | <i>n</i> -channel                                           |                           |          |
|---------|-------------------------------------------------------------|---------------------------|----------|-------------------------------------------------------------|---------------------------|----------|
| device  | Mobility (cm <sup>2</sup> V <sup>-1</sup> s <sup>-1</sup> ) | <i>V</i> <sub>T</sub> (V) | On/off   | Mobility (cm <sup>2</sup> V <sup>-1</sup> s <sup>-1</sup> ) | <i>V</i> <sub>T</sub> (V) | On/off   |
| 1       | 0.14289                                                     | -53.43                    | 8.54E+05 | 0.00026                                                     | 45.83                     | 4.44E+05 |
| 2       | 0.09136                                                     | -29.53                    | 2.30E+04 | 0.00025                                                     | 39.65                     | 1.10E+05 |
| 3       | 0.10317                                                     | -37.61                    | 5.40E+05 | 0.00028                                                     | 44.10                     | 8.65E+05 |
| 4       | 0.08205                                                     | -27.65                    | 3.88E+04 | 0.00021                                                     | 41.52                     | 6.87E+04 |
| 5       | 0.06442                                                     | -60.50                    | 1.55E+06 | 0.00026                                                     | 41.84                     | 4.64E+05 |
| 6       | 0.15692                                                     | -52.73                    | 1.27E+06 | 0.00019                                                     | 46.08                     | 2.60E+06 |
| 7       | 0.09226                                                     | -30.25                    | 7.27E+04 | 0.00024                                                     | 41.29                     | 1.32E+05 |
| 8       | 0.14455                                                     | -52.10                    | 1.16E+07 | 0.00018                                                     | 46.02                     | 2.69E+06 |
| 9       | 0.09516                                                     | -28.70                    | 4.01E+04 | 0.00024                                                     | 39.95                     | 1.27E+05 |
| Average | 0.10809                                                     | -41.39                    | 1.78E+06 | 0.00023                                                     | 42.92                     | 8.34E+05 |

## 7. UV-vis absorption of TPBIID films.

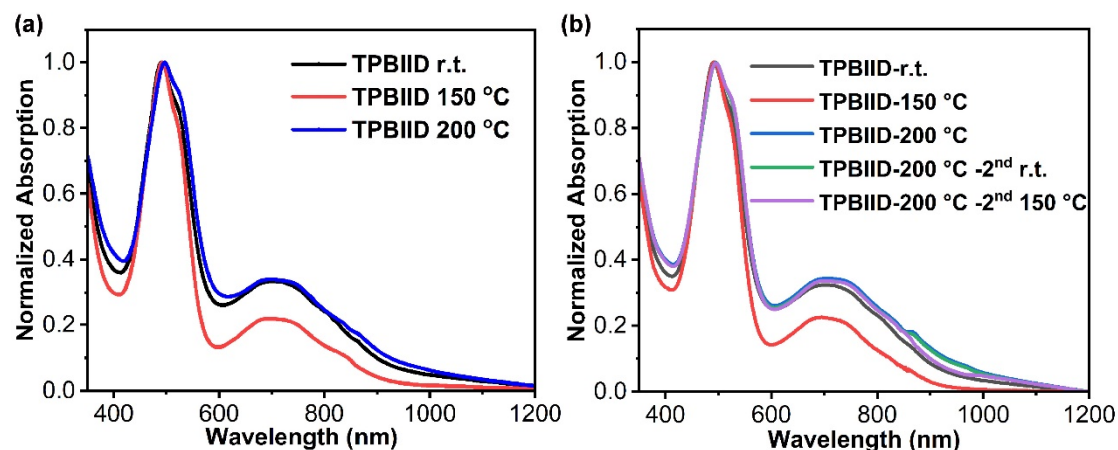

**Figure S7.** UV-vis absorption of TPBIID films: (a) under different annealing conditions; (b) additional stability test of 200 °C annealing films (2<sup>nd</sup> means the film was measured after 24 hours of the 1<sup>st</sup> measurement.).

## 8. Morphologies of PTPBIID-BT film annealed at 200 °C.

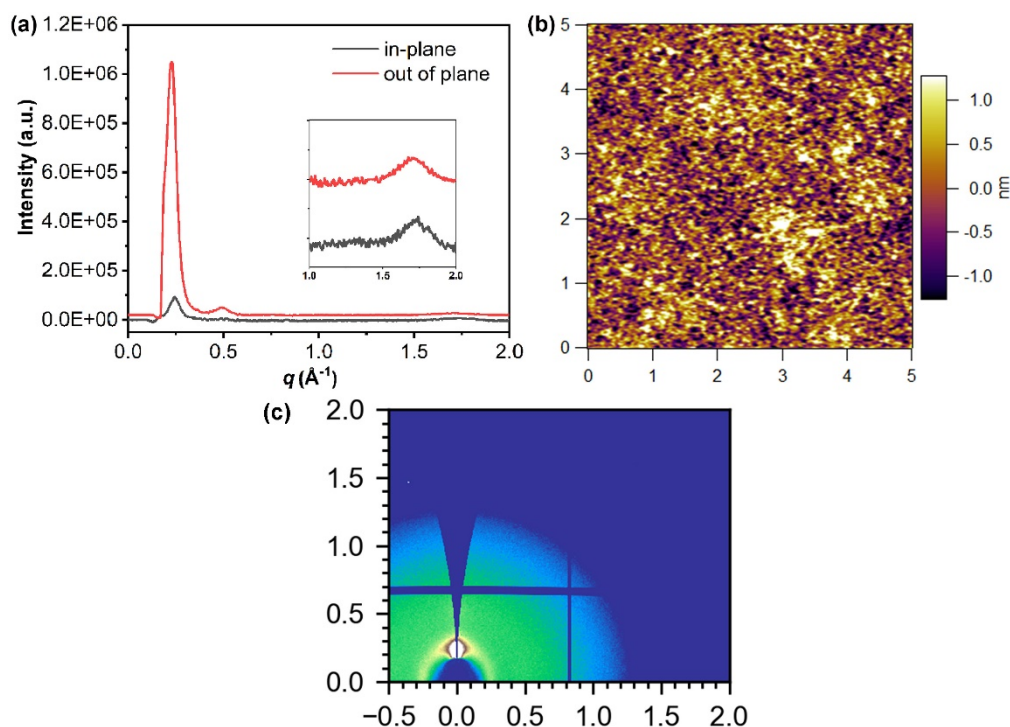

**Figure S8.** Morphologies of PTPBIID-BT: (a) GIWAXS line-cut profile of film annealed at 200 °C; (b) AFM height image of film annealed at 200 °C; (c) GIWAXS 2D image of pristine film.



## 9. NMR spectra

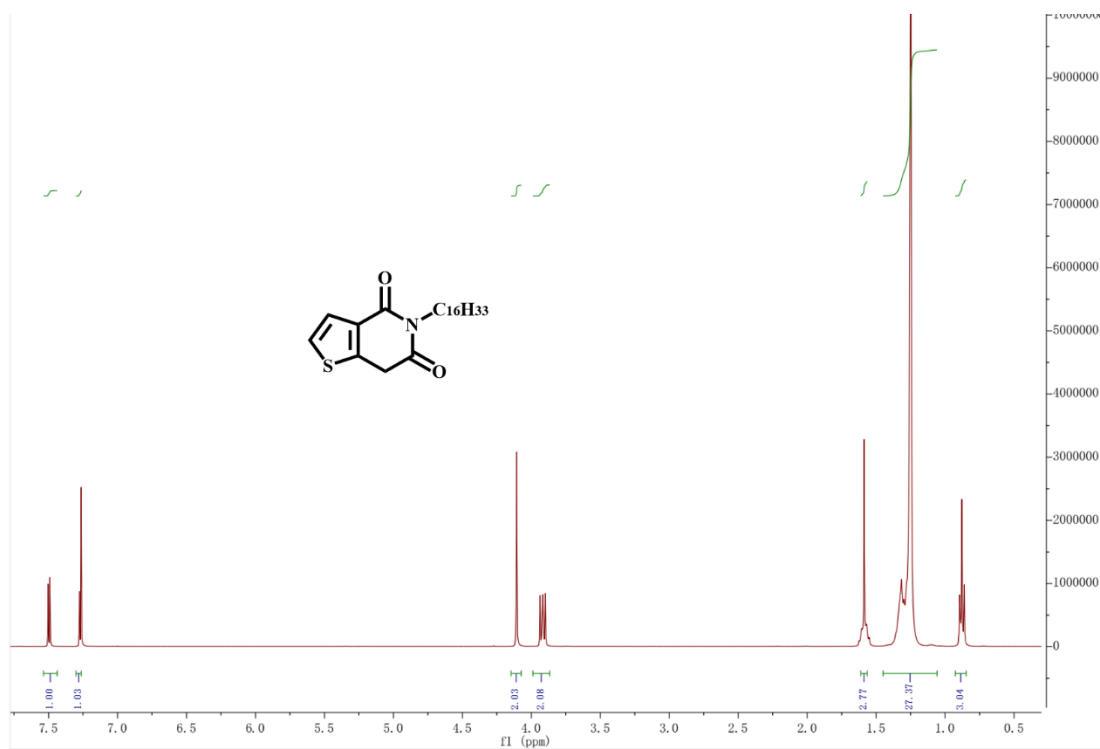

**Figure S9.** <sup>1</sup>H NMR spectrum of compound 2a.

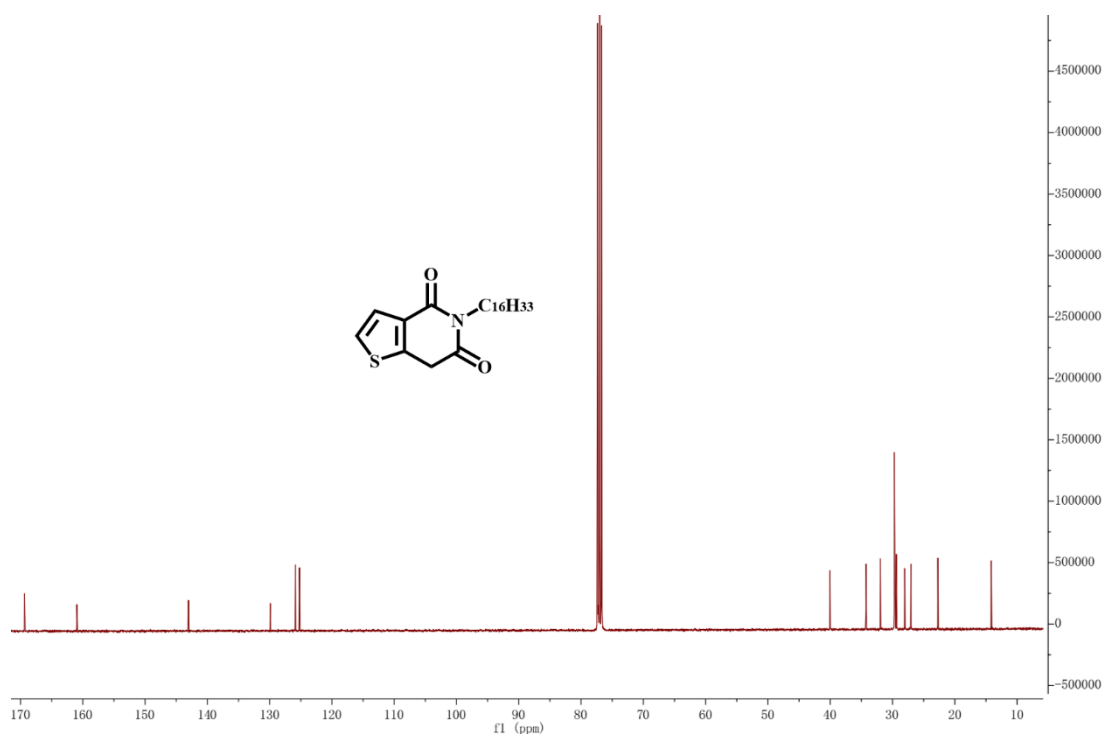

**Figure S10.** <sup>13</sup>C NMR spectrum of compound 2a.

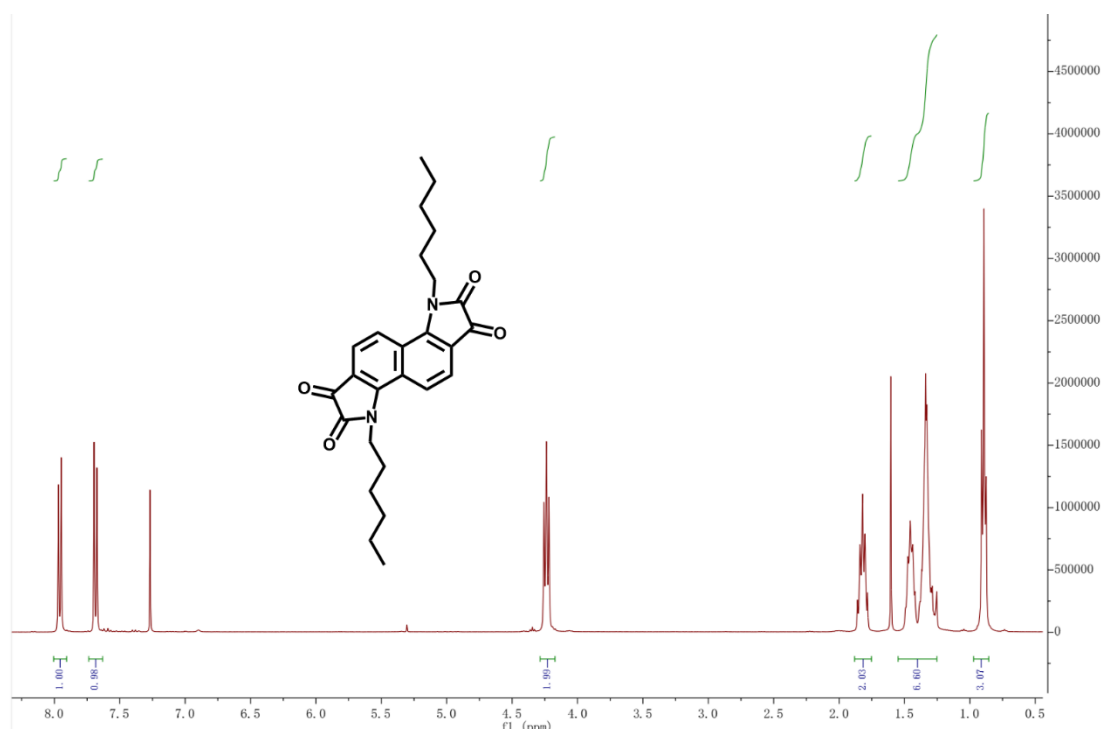

**Figure S11.**  $^1\text{H}$  NMR spectrum of compound **4a**.

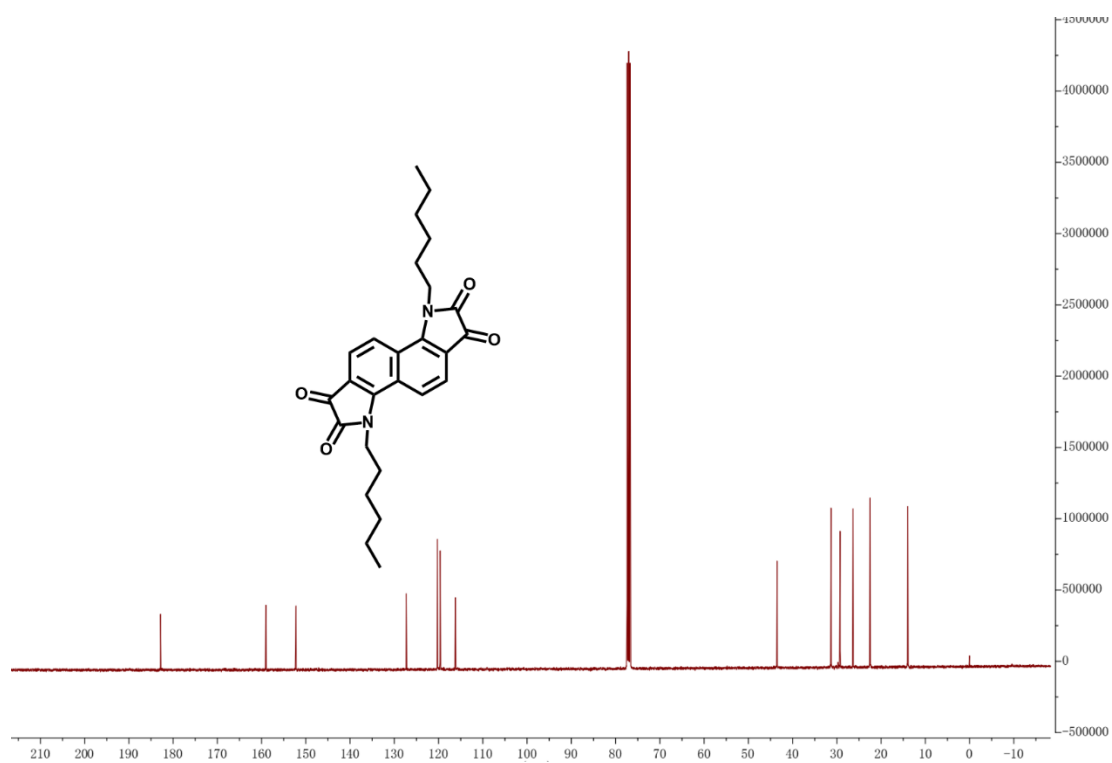

**Figure S12.**  $^{13}\text{C}$  NMR spectrum of compound **4a**.

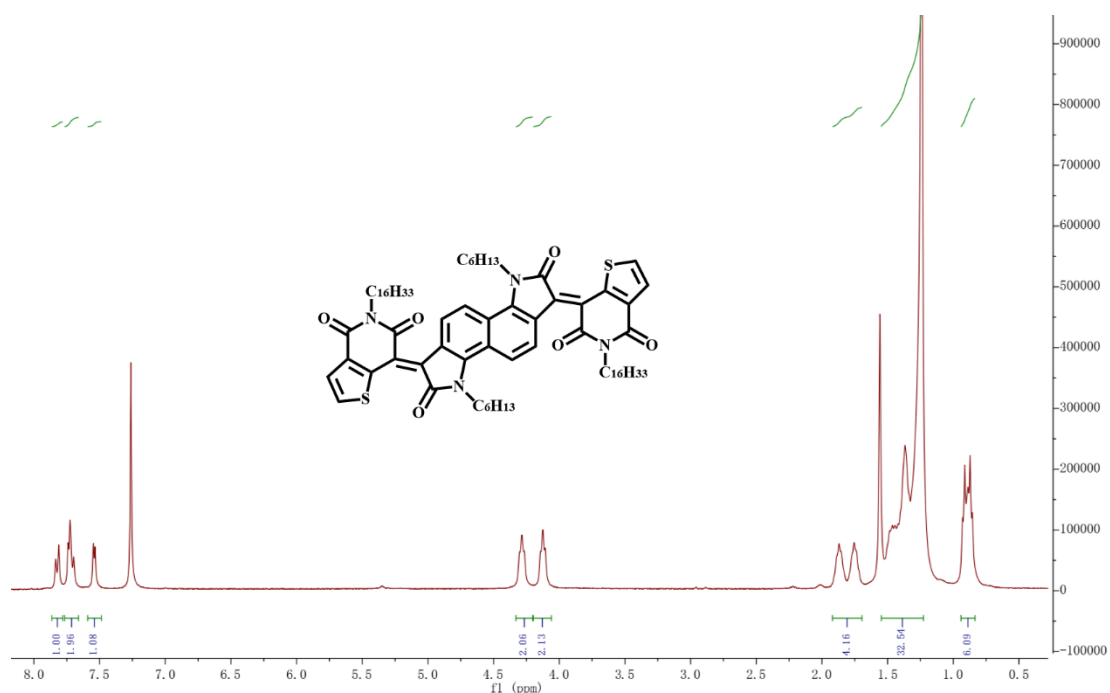

**Figure S13.** <sup>1</sup>H NMR spectrum of compound TPBIID.

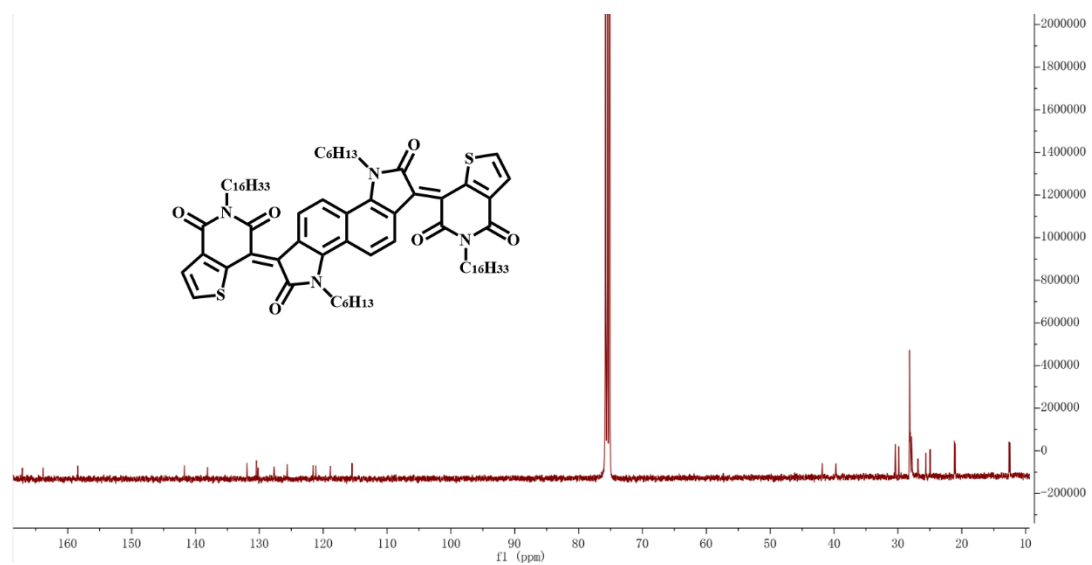

**Figure S14.** <sup>13</sup>C NMR spectrum of compound TPBIID.

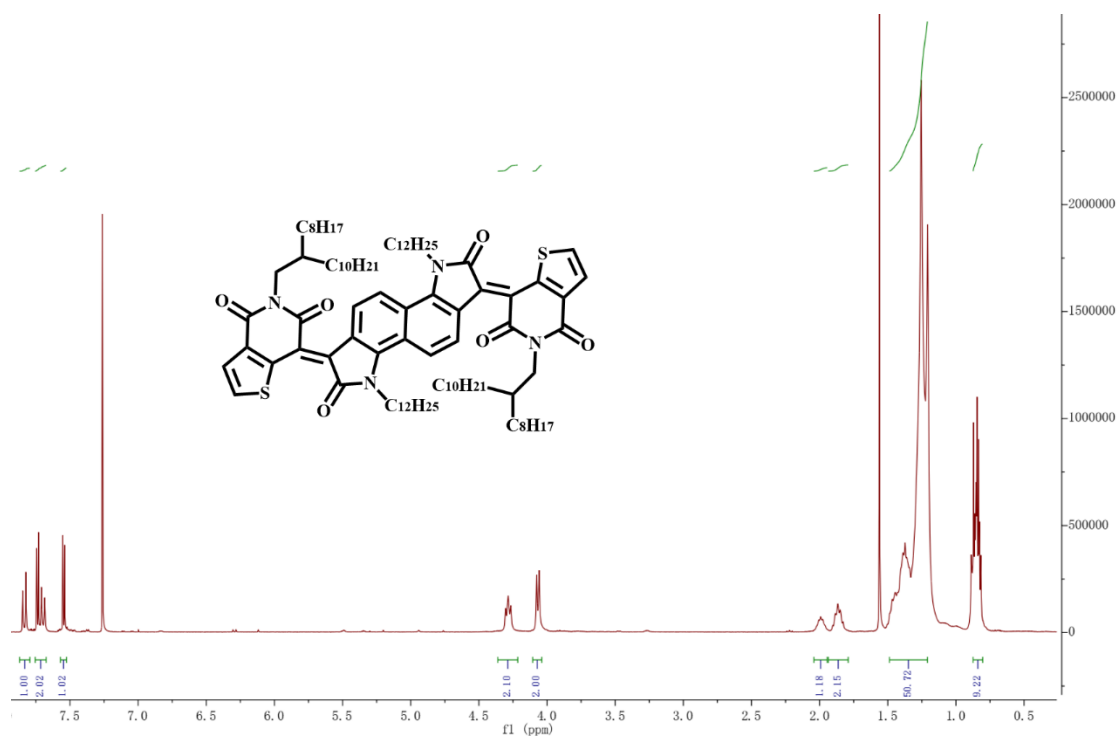

**Figure S15.** <sup>1</sup>H NMR spectrum of compound TPBIID-OD.

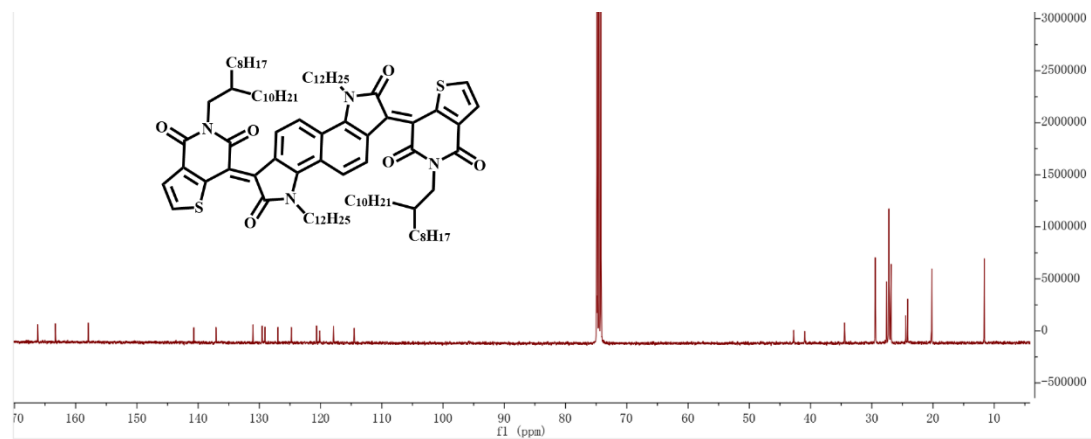

**Figure S16.** <sup>13</sup>C NMR spectrum of compound TPBIID-OD.

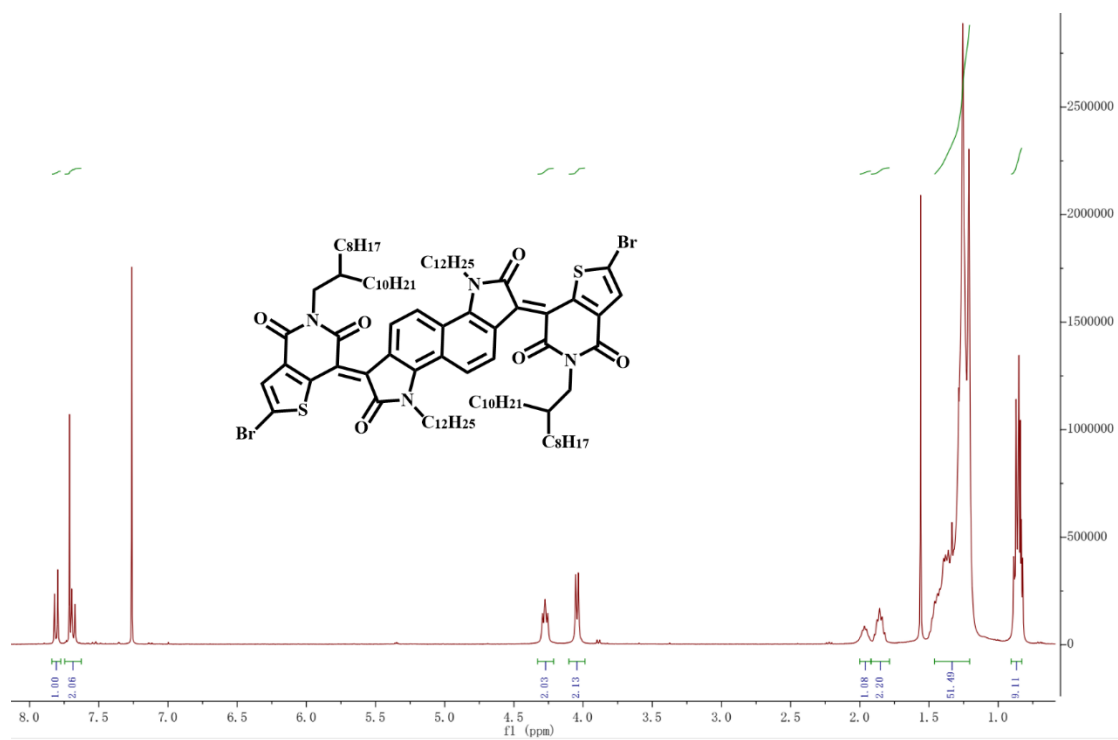

**Figure S17.** <sup>1</sup>H NMR spectrum of compound **5**.

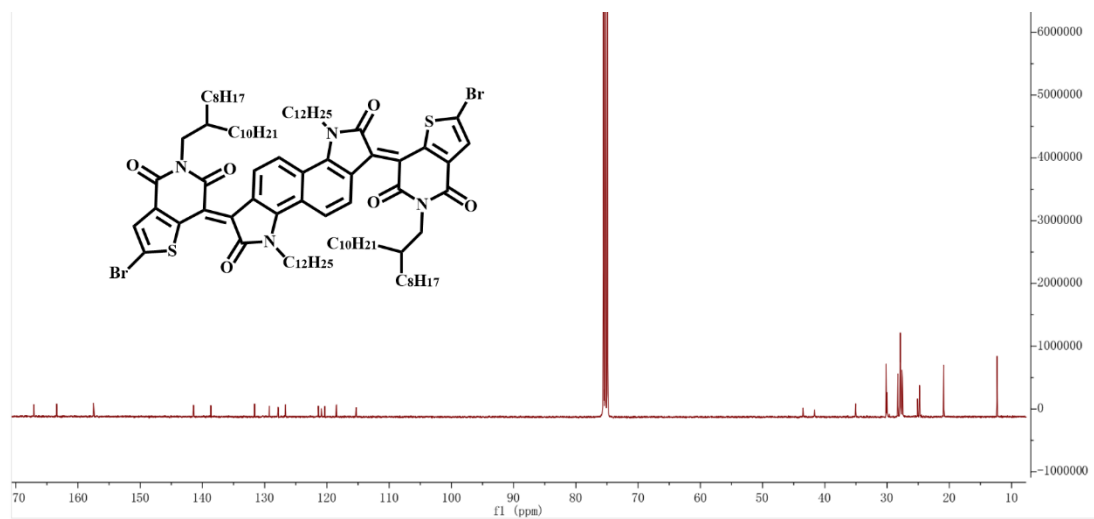

**Figure S18.** <sup>13</sup>C NMR spectrum of compound **5**.
